# Supplementary material for: The rational design of hierarchical CoS2/CuCo2S4 for three-dimensional all-solid-state hybrid supercapacitors with high energy density, rate efficiency, and operational stability
Source: Royal Society of Chemistry journal article supplement (doi:10.1039/d0se01698e), 2020-12-22
Supplement: d0se01698e1.pdf [file d0se01698e1.pdf]

## Supplementary Information

### The rational design of hierarchical $\text{CoS}_2/\text{CuCo}_2\text{S}_4$ for three-dimensional all-solid-state hybrid supercapacitors with high energy density, rate efficiency, and operational stability

Yogesh Kumar Sonia,<sup>[a]</sup> Mahesh Kumar Paliwal,<sup>[a]</sup> and Sumanta Kumar Meher\*<sup>[a]</sup>

<sup>[a]</sup>Department of Chemistry, Malaviya National Institute of Technology Jaipur, Rajasthan 302017, India

Email\*: skmeher.chy@mnit.ac.in

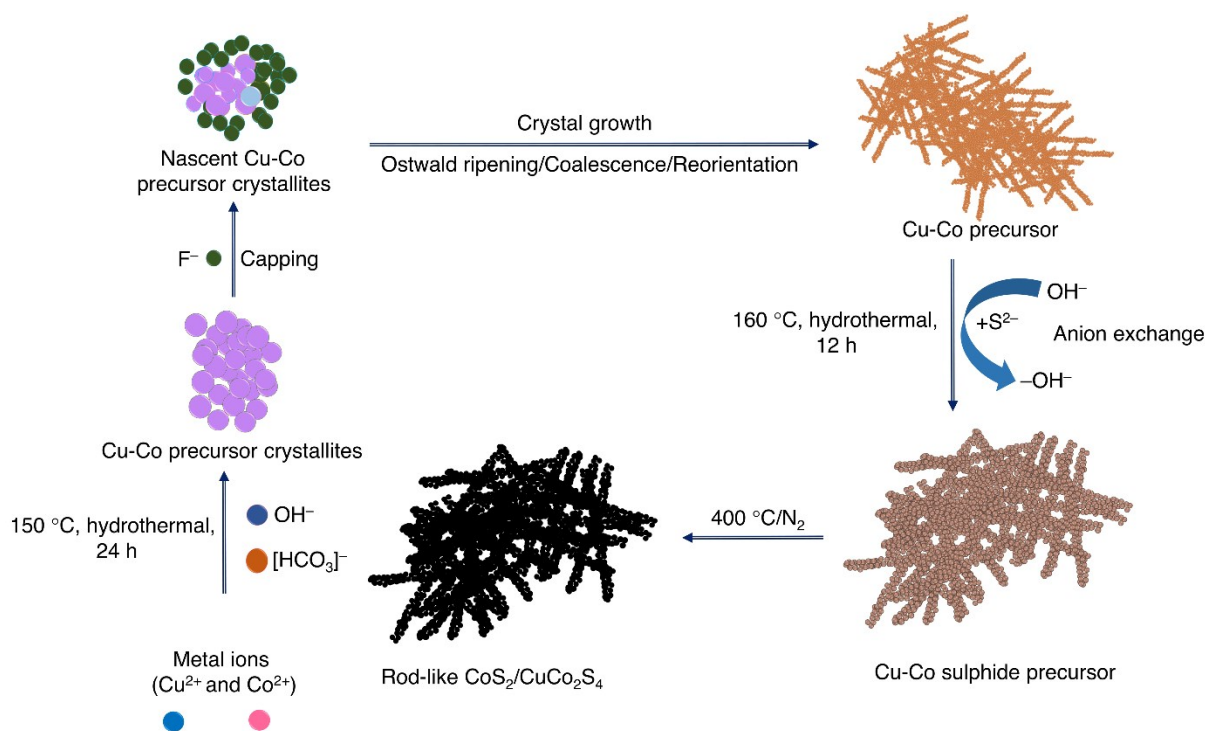

**Scheme S1** Plausible mechanism for the formation of  $\text{CoS}_2/\text{CuCo}_2\text{S}_4$  rod-like microstructure.

**Table S1.** List of major peaks (binding energy) as shown in the survey XPS profile of  $\text{CoS}_2/\text{CuCo}_2\text{S}_4$  and their corresponding attributions

| Binding energy (eV) | Attribution          |
|---------------------|----------------------|
| 952.30              | Cu 2p <sub>1/2</sub> |
| 932.40              | Cu 2p <sub>3/2</sub> |
| 838.42              | shake-up satellite   |
| 796.78              | shake-up satellite   |
| 778.3               | Co 2p                |
| 712.27              | shake-up satellite   |
| 530.9               | O 1s                 |
| 284.15              | C 1s                 |
| 224.46              | S 2s                 |
| 160.76              | S 2p                 |
| 121.89              | Cu 3s                |
| 102.5               | Co 3s                |
| 74.99               | Cu 3p                |
| 58.18               | Co 3p                |

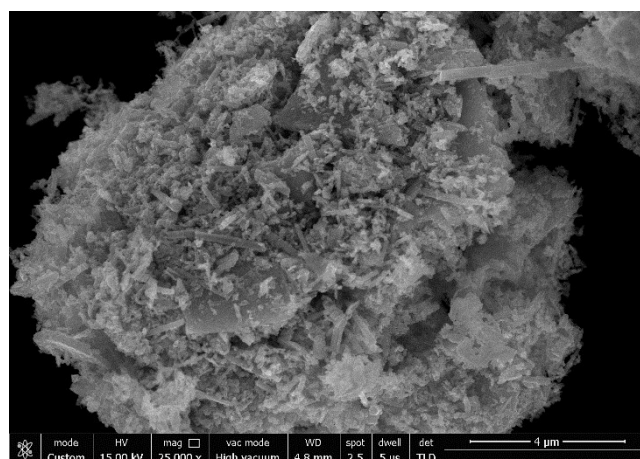

**Fig. S1** FESEM image of  $\text{CoS}_2/\text{CuCo}_2\text{S}_4$ , which has been used for EDX elemental mapping.

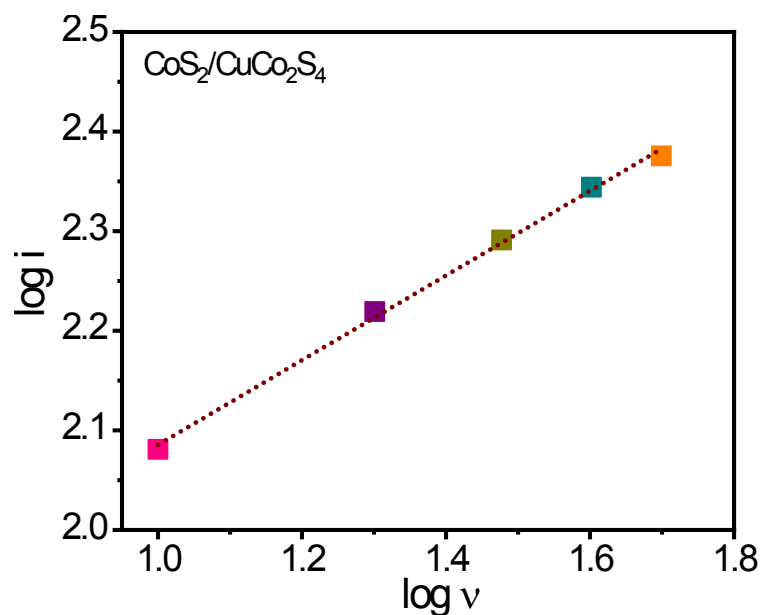

**Fig. S2** Linear-fitted  $\log \nu$  vs.  $\log i$  plot of  $\text{CoS}_2/\text{CuCo}_2\text{S}_4$

**Table S2.** Comparison of the specific capacitance and charge transfer resistance values of  $\text{CoS}_2/\text{CuCo}_2\text{S}_4$  with reported  $\text{CuCo}_2\text{S}_4$ -based materials.

| Sl. No. | Sample Name                                                | $C_s$ @Current Density (3-Electrode Setup)                                                                                                                                                                                                      | $C_s$ @Scan Rate (3-Electrode Setup)           | $R_{ct}$ ( $\Omega$ ) from EIS (3-Electrode Setup) | Reference |
|---------|------------------------------------------------------------|-------------------------------------------------------------------------------------------------------------------------------------------------------------------------------------------------------------------------------------------------|------------------------------------------------|----------------------------------------------------|-----------|
| 1       | $\text{CuCo}_2\text{S}_4$ dandelion-like                   | 424 F $\text{g}^{-1}$ @1 A $\text{g}^{-1}$                                                                                                                                                                                                      | -                                              | -                                                  | [s1]      |
| 2       | $\text{CuCo}_2\text{S}_4$ @CNT                             | 1690 F $\text{g}^{-1}$ @1 A $\text{g}^{-1}$                                                                                                                                                                                                     | -                                              | -                                                  | [s2]      |
| 3       | $\text{CuCo}_2\text{S}_4$ -rGO                             | 525 F $\text{g}^{-1}$ @1 A $\text{g}^{-1}$ ;<br>425 F $\text{g}^{-1}$ @5 A $\text{g}^{-1}$ ;<br>370 F $\text{g}^{-1}$ @10 A $\text{g}^{-1}$ ;<br>326 F $\text{g}^{-1}$ @15 A $\text{g}^{-1}$ ;<br>303 F $\text{g}^{-1}$ @20 A $\text{g}^{-1}$   | 665 F $\text{g}^{-1}$ @ 7.5 mV $\text{s}^{-1}$ | -                                                  | [s3]      |
| 4       | CNTs@NC@ $\text{CuCo}_2\text{S}_4$                         | 1604 F $\text{g}^{-1}$ @1 A $\text{g}^{-1}$ ;<br>1044 F $\text{g}^{-1}$ @2 A $\text{g}^{-1}$ ;<br>1000 F $\text{g}^{-1}$ @5 A $\text{g}^{-1}$ ;<br>955 F $\text{g}^{-1}$ @10 A $\text{g}^{-1}$ ;<br>896 F $\text{g}^{-1}$ @20 A $\text{g}^{-1}$ | -                                              | 135.6                                              | [s4]      |
| 5       | $\text{CuCo}_2\text{S}_4$ -HNN (hollow nano-needle arrays) | 2163 F $\text{g}^{-1}$ @6 A $\text{g}^{-1}$                                                                                                                                                                                                     | -                                              | -                                                  | [s5]      |
| 6       | $\text{CuCo}_2\text{S}_4/\text{CNT}/\text{Graphene}$       | 504 F $\text{g}^{-1}$ @10 A $\text{g}^{-1}$                                                                                                                                                                                                     | -                                              | -                                                  | [s6]      |

|    |                                                                 |                                                                                                                                                                                                                                                                                            |                                                                                                |      |       |
|----|-----------------------------------------------------------------|--------------------------------------------------------------------------------------------------------------------------------------------------------------------------------------------------------------------------------------------------------------------------------------------|------------------------------------------------------------------------------------------------|------|-------|
| 7  | CuCo <sub>2</sub> S <sub>4</sub> nanowire                       | 875 F g <sup>-1</sup> @1 A g <sup>-1</sup>                                                                                                                                                                                                                                                 | -                                                                                              | 1.96 | [s7]  |
| 8  | CuCo <sub>2</sub> S <sub>4</sub> nanorod array                  | 1536 F g <sup>-1</sup> @1 A g <sup>-1</sup> ;<br>1295 F g <sup>-1</sup> @5 A g <sup>-1</sup> ;<br>1157 F g <sup>-1</sup> @10 A g <sup>-1</sup> ;<br>1026 F g <sup>-1</sup> @20 A g <sup>-1</sup>                                                                                           | -                                                                                              | -    | [s8]  |
| 9  | CuCo <sub>2</sub> S <sub>4</sub> /GA<br>(graphene aerogel)      | 668 F g <sup>-1</sup> @1 A g <sup>-1</sup> ;<br>620 F g <sup>-1</sup> @2 A g <sup>-1</sup> ;<br>588 F g <sup>-1</sup> @5 A g <sup>-1</sup> ;<br>535 F g <sup>-1</sup> @10 A g <sup>-1</sup> ;<br>480 F g <sup>-1</sup> @20 A g <sup>-1</sup>                                               | -                                                                                              | -    | [s9]  |
| 10 | CuCo <sub>2</sub> S <sub>4</sub> micro-sphere                   | 516 F g <sup>-1</sup> @10 A g <sup>-1</sup>                                                                                                                                                                                                                                                | 665 F g <sup>-1</sup> @10 mV s <sup>-1</sup> ;<br>482 F g <sup>-1</sup> @50 mV s <sup>-1</sup> | 0.26 | [s10] |
| 11 | CuCo <sub>2</sub> S <sub>4</sub> nanoparticle                   | 772 F g <sup>-1</sup> @2 A g <sup>-1</sup>                                                                                                                                                                                                                                                 | -                                                                                              | -    | [s11] |
| 12 | CuCo <sub>2</sub> S <sub>4</sub> ball-in-ball                   | 442 F g <sup>-1</sup> @0.5 A g <sup>-1</sup>                                                                                                                                                                                                                                               | -                                                                                              | -    | [s12] |
| 13 | CuCo <sub>2</sub> S <sub>4</sub><br>agglomerate<br>nanoparticle | 580 F g <sup>-1</sup> @1 A g <sup>-1</sup> ;<br>529 F g <sup>-1</sup> @2 A g <sup>-1</sup> ;<br>482 F g <sup>-1</sup> @3 A g <sup>-1</sup> ;<br>437 F g <sup>-1</sup> @4 A g <sup>-1</sup> ;<br>406 F g <sup>-1</sup> @5 A g <sup>-1</sup> ;<br>354 F g <sup>-1</sup> @7 A g <sup>-1</sup> | -                                                                                              | 5.65 | [s13] |
| 14 | CuCo <sub>2</sub> S <sub>4</sub> microsphere                    | 1566 F g <sup>-1</sup> @2 A g <sup>-1</sup>                                                                                                                                                                                                                                                | -                                                                                              | 0.27 | [s14] |
| 15 | CuCo <sub>2</sub> S <sub>4</sub> /NG<br>(N-doped graphene)      | 1005 F g <sup>-1</sup> @1 A g <sup>-1</sup> ;<br>978 F g <sup>-1</sup> @3 A g <sup>-1</sup> ;<br>949 F g <sup>-1</sup> @5 A g <sup>-1</sup> ;<br>901 F g <sup>-1</sup> @10 A g <sup>-1</sup> ;<br>831 F g <sup>-1</sup> @20 A g <sup>-1</sup>                                              | -                                                                                              | -    | [s15] |
| 16 | C@CuCo <sub>2</sub> S <sub>4</sub>                              | 854 F g <sup>-1</sup> @1 A g <sup>-1</sup> ;<br>774 F g <sup>-1</sup> @3 A g <sup>-1</sup> ;<br>681 F g <sup>-1</sup> @5 A g <sup>-1</sup> ;<br>597 F g <sup>-1</sup> @7 A g <sup>-1</sup> ;<br>485 F g <sup>-1</sup> @10 A g <sup>-1</sup>                                                | -                                                                                              | -    | [s16] |
| 17 | CuCo <sub>2</sub> S <sub>4</sub> nanoparticles                  | 449 F g <sup>-1</sup> @1 A g <sup>-1</sup> ;<br>443 F g <sup>-1</sup> @1.5 A g <sup>-1</sup> ;<br>433 F g <sup>-1</sup> @3 A g <sup>-1</sup> ;<br>401 F g <sup>-1</sup> @5 A g <sup>-1</sup>                                                                                               | -                                                                                              | 0.56 | [s17] |
| 18 | GQD (graphene<br>quantum dots)/CuCo <sub>2</sub> S <sub>4</sub> | 1725 F g <sup>-1</sup> @0.1 A g <sup>-1</sup>                                                                                                                                                                                                                                              | -                                                                                              | -    | [s18] |

|    |                                                      |                                                                                                                                                                                                                                                                                                 |                                                                                                                                                                                                                                                             |      |           |
|----|------------------------------------------------------|-------------------------------------------------------------------------------------------------------------------------------------------------------------------------------------------------------------------------------------------------------------------------------------------------|-------------------------------------------------------------------------------------------------------------------------------------------------------------------------------------------------------------------------------------------------------------|------|-----------|
| 19 | N-doped C-coated<br>CuCo <sub>2</sub> S <sub>4</sub> | 1228 F g <sup>-1</sup> @1 A g <sup>-1</sup> ;<br>1070 F g <sup>-1</sup> @2 A g <sup>-1</sup> ;<br>1003 F g <sup>-1</sup> @3 A g <sup>-1</sup> ;<br>933 F g <sup>-1</sup> @5 A g <sup>-1</sup> ;<br>864 F g <sup>-1</sup> @10 A g <sup>-1</sup> ;<br>784 F g <sup>-1</sup> @20 A g <sup>-1</sup> | 2002 F g <sup>-1</sup> @5 mV s <sup>-1</sup> ;<br>1831 F g <sup>-1</sup> @10 mV s <sup>-1</sup> ;<br>1535 F g <sup>-1</sup> @ 20 mV s <sup>-1</sup> ;<br>1168 F g <sup>-1</sup> @50 mV s <sup>-1</sup> ;<br>921 F g <sup>-1</sup> @ 100 mV s <sup>-1</sup>  | 0.39 | [s19]     |
| 20 | CoS <sub>2</sub> /CuCo <sub>2</sub> S <sub>4</sub>   | 2438 F g <sup>-1</sup> @2 A g <sup>-1</sup> ;<br>1995 F g <sup>-1</sup> @3 A g <sup>-1</sup> ;<br>1730 F g <sup>-1</sup> @4 A g <sup>-1</sup> ;<br>1590 F g <sup>-1</sup> @5 A g <sup>-1</sup> ;<br>1492 F g <sup>-1</sup> @6 A g <sup>-1</sup>                                                 | 4653 F g <sup>-1</sup> @10 mV s <sup>-1</sup> ;<br>3618 F g <sup>-1</sup> @20 mV s <sup>-1</sup> ;<br>3007 F g <sup>-1</sup> @ 30 mV s <sup>-1</sup> ;<br>2552 F g <sup>-1</sup> @40 mV s <sup>-1</sup> ;<br>2169 F g <sup>-1</sup> @ 50 mV s <sup>-1</sup> | 0.23 | This work |

**Table S3.** Comparison of the energy density, power density and multiple-cycle capacitance retention of CoS<sub>2</sub>/CuCo<sub>2</sub>S<sub>4</sub>||N-rGO ASSHSC device with reported CuCo<sub>2</sub>S<sub>4</sub>-based hybrid supercapacitor devices.

| Sl. No. | Hybrid Supercapacitor Device                                            | Energy Density ( $E_D$ ; W h Kg <sup>-1</sup> ) | Power Density ( $P_D$ ; W Kg <sup>-1</sup> ) | Capacitance Retention (%/No. of cycle) | Reference |
|---------|-------------------------------------------------------------------------|-------------------------------------------------|----------------------------------------------|----------------------------------------|-----------|
| 1       | CuCo <sub>2</sub> S <sub>4</sub> /CC  AC                                | 17.12                                           | 194.4                                        | 78.4 / 3,000                           | [s20]     |
| 2       | CuCo <sub>2</sub> S <sub>4</sub>   GA                                   | 22                                              | 1080                                         | 70.4 / 5,000                           | [s9]      |
| 3       | CuCo <sub>2</sub> S <sub>4</sub> /CNT  AC                               | 23.2                                            | 402.7                                        | 85.7 / 10,000                          | [s21]     |
| 4       | CuCo <sub>2</sub> S <sub>4</sub> /N,S-RGO  N,S-RGO                      | 10.8                                            | 400                                          | 88.9 / 5,000                           | [s22]     |
| 5       | CuCo <sub>2</sub> S <sub>4</sub> @NiCo <sub>2</sub> S <sub>4</sub>   AC | 23.4                                            | 400                                          | 71 / 3,000                             | [s23]     |
| 6       | CuCo <sub>2</sub> S <sub>4</sub>   AC                                   | 15.0                                            | 422.5                                        | 94.7 / 5,000                           | [s17]     |
| 7       | CuCo <sub>2</sub> S <sub>4</sub>   AC-ASC                               | 16                                              | 240                                          | 99.5 / 6,000                           | [s13]     |
| 8       | CuCo <sub>2</sub> S <sub>4</sub>   AC                                   | 22                                              | 405                                          | 62 / 20,000                            | [s1]      |
| 9       | CoS <sub>2</sub> /CuCo <sub>2</sub> S <sub>4</sub>   N-rGO              | 32.4                                            | 4000                                         | 92.8 /10,000                           | This work |

## References

- [s1] J. P. Chen, S. Q. Gao, P. P. Zhang, B. Q. Wang, X. C. Wang and F. Liu, *J. Alloys Compd.* **2020**, 825, 153984.
- [s2] J.-M. Xu, X.-C. Wang and J.-P. Cheng, *ACS. Omega* **2020**, 5, 1305–1311.
- [s3] L.-L. Liu, K. P. Annamalai and Y.-S. Tao, *New Carbon Mater.* **2016**, 31, 336–342.
- [s4] R. Jin, Y. Cui, S. Gao, S. Zhang, L. Yang and G. Li, *Electrochim. Acta* **2018**, 273, 43–52.
- [s5] S. E. Moosavifard, S. Fani and M. Rahmanian, *Chem. Commun.* **2016**, 52, 4517–4520.
- [s6] J. Shen, J. Tang, P. Dong, Z. Zhang, J. Ji, R. Baines and M. Ye, *RSC Adv.* **2016**, 6, 13456–13460.
- [s7] S. Liu, Y. Yin, K. S. Hui, K. N. Hui, S. C. Lee and S.-C. Jun, *Adv. Sci.* **2018**, 5, 1800733.
- [s8] S. Cheng, T. Shi, C. Chen, Y. Zhong, Y. Huang, X. Tao, J. Li, G. Liao and Z. Tang, *Sci. Rep.* **2017**, 7, 6681.
- [s9] Z. Tian, X. Wang, B. Li, H. Li and Y. Wu, *Electrochim. Acta* **2019**, 298, 321–329.
- [s10] A. T. A. Ahmed, H. S. Chavan, Y. Jo, S. Cho, J. Kim, S. M. Pawar, J. L. Gunjekar, A. I. Inamdar, H. Kim and H. Im, *J. Alloys Compd.* **2017**, 724, 744–751.
- [s11] Y. Zhu, X. Ji, H. Chen, L. Xi, W. Gong and Y. Liu, *RSC Adv.* **2016**, 6, 84236–84241.
- [s12] Y. H. Lee, B. K. Kang, M. S. Kim, H. W. Choi, D. S. Choi, M. Kumar and D. H. Yoon, *Phys. Status Solidi A* **2018**, 215, 1700936.
- [s13] F. Wang, J. Zheng, G. Li, J. Ma, C. Yang and Q. Wang, *Mater. Chem. Phys.* **2018**, 215, 121–126.
- [s14] A. Mohammadi, S. E. Moosavifard, A. G. Tabrizi, M. M. Abdi and G. Karimi, *ACS Appl. Energy Mater.* **2019**, 2, 627–635.
- [s15] M. Guo, J. Balamurugan, T. D. Thanh, N. H. Kim and J. H. Lee, *J. Mater. Chem. A* **2016**, 4, 17560–17571.
- [s16] F. Wang, J. Zheng, J. Ma, K. Zhou and Q. Wang, *J. Nanopart. Res.* **2019**, 21, 189.

- [s17] Y. Xu, T. Zhou, X. Cao, W. Zhao, J. Chang, W. Zhu, W. Guo and W. Du, *Mater. Res. Bull.* **2017**, *91*, 68–76.
- [s18] Y. Huang, L. Lin, T. Shi, S. Cheng, Y. Zhong, C. Chen and Z. Tang, *Appl. Surf. Sci.* **2019**, *463*, 498–503.
- [s19] Z. Wang, Z. Zhu, Q. Zhang, M. Zhai, J. Gao, C. Chen and B. Yang, *Ceram. Int.* **2019**, *45*, 21286–21292.
- [s20] T. Xie, Y. Gai, Y. Shang, C. Ma, L. Su, J. Liu and L. Gong, *Eur. J. Inorg. Chem.* **2018**, *43*, 4711–4719.
- [s21] H. Li, Z. Li, Z. Wu, M. Sun, S. Han, C. Cai, W. Shen, X. Liu and Y. Fu, *J. Colloid Interface Sci.* **2019**, *549*, 105–113.
- [s22] Z. Li, H. Lv, Z. Wang, A. Gu, X. He and L. Wang, *Mater. Res. Express* **2019**, *6*, 085523.
- [s23] L. Ma, T. Chen, S. Li, P. Gui and G. Fang, *Nanotechnology* **2019**, *30*, 255603.
